# Supplementary material for: TBC1D24 genotype–phenotype correlation: Epilepsies and other neurologic features
Source: PubMed Central journal article supplement (PMC4932231; doi:10.1212/wnl.0000000000002807), 2016-07-05
Supplement: supp_WNL.0000000000002807_Figure_e-1.pdf [file supp_WNL.0000000000002807_Figure_e-1.pdf]

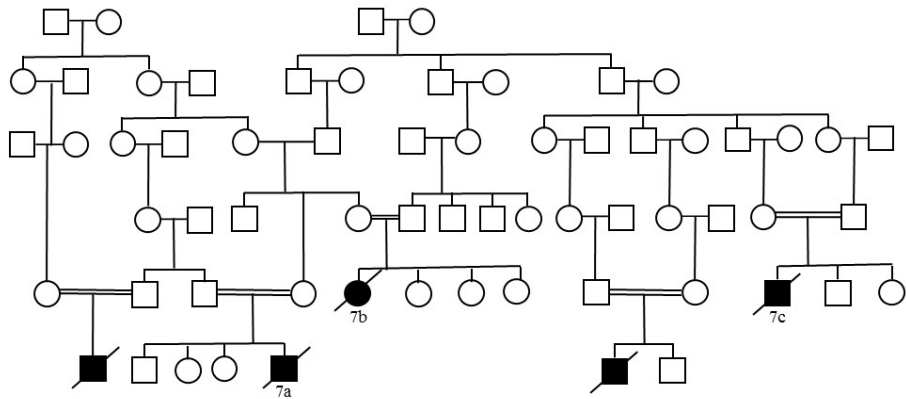

Family 7a-c

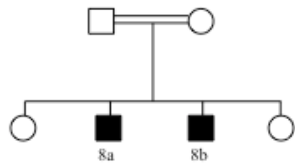

Family 8a-b

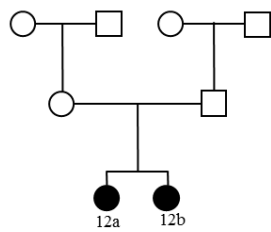

Family 12a-b

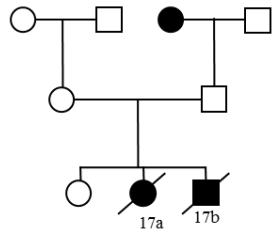

Family 17a-b

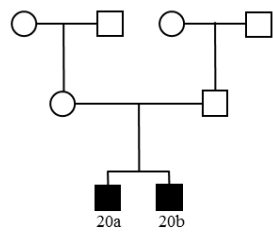

Family 20a-b

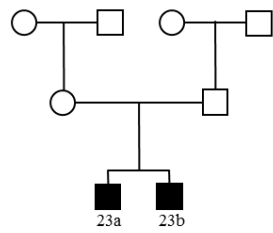

Family 23a-b
